# Supplementary material
Source: PubMed Central journal article supplement (PMC5283573)
Supplement: NIHMS843720-supplement-Supporting_Information.pdf [file NIHMS843720-supplement-Supporting_Information.pdf]

## Supporting Information

### **Allosteric communication disrupted by small molecule binding to the Imidazole glycerol phosphate synthase protein-protein interface.**

*Ivan Rivalta\*<sup>§,#</sup>, George P. Lisi<sup>#</sup>, Ning-Shiuan Snoeberger<sup>#</sup>, Gregory Manley<sup>#</sup>, J. Patrick Loria\*<sup>#,‡</sup> and Victor S. Batista\*<sup>#</sup>*

<sup>§</sup>Univ Lyon, Ens de Lyon, CNRS, Université Lyon 1, Laboratoire de Chimie UMR 5182, F-69342, Lyon, France. <sup>#</sup>Department of Chemistry and <sup>‡</sup>Department of Molecular Biophysics and Biochemistry Yale University, P.O. Box 208107, New Haven, CT 06520-8107, USA.

#### **Table of content**

- **Figure S1.** Hydrophobic contacts at the bottom of the HisF barrel in the apo, PRFAR-bound binary and ternary complexes.
- **Table S1.** Average distances of hydrophobic contacts at the effector site.
- **Figure S2.** Relative positions of the  $f\alpha 2$  and  $f\alpha 3$  helices in the apo, PRFAR-bound binary and ternary complexes.
- **Figure S3.** The influence of the inhibitor binding on the ammonia gate.
- **Figure S4.** Chemical shift perturbations in the HisF domain of apo PRFAR-bound IGPS upon titration with 3.
- **Figure S5.** Representative correlation peaks from  $^1\text{H}$ - $^{15}\text{N}$  HSQC NMR experiments of  $^{15}\text{N}$ -labeled HisF-IGPS.
- **Figure S6.** Chemical shifts changes in apo IGPS induced by binding of 3.
- **Table S2.**  $^{15}\text{N}$  Chemical shift perturbations of HisH residues upon titration of apo IGPS with 3
- **Figure S7.** Representative correlation peaks from  $^1\text{H}$ - $^{15}\text{N}$  HSQC NMR experiments of  $^{15}\text{N}$ -labeled HisF-IGPS.
- **Figure S8.** Chemical shifts changes in PRFAR-bound IGPS induced by binding of 3.
- **Figure S9.** Breathing motion of the PRFAR-bound 3-IGPS ternary complexes.

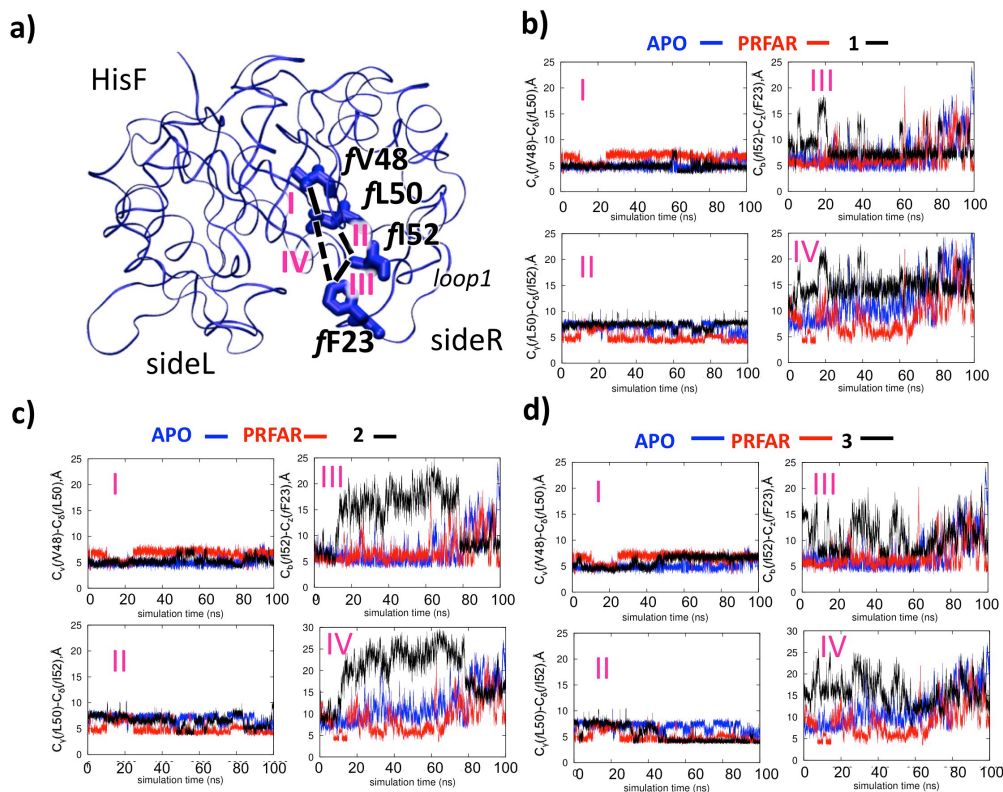

**Figure S1. Hydrophobic contacts at the bottom of the HisF barrel in the apo, PRFAR-bound binary and ternary complexes.** The distances (in Å) between amino acid residues with hydrophobic side chains, i.e. *fV48*, *fL50* and *fI52* (a), are monitored along the 0.1  $\mu$ s MD simulations of the apo (blue), binary PRFAR-bound (red) and the ternary complexes (in black) with potential inhibitors 1-3 (b-d).

**Table S1. Average distances (in Å) between hydrophobic amino acid residues at the bottom of the HisF barrel in the apo, PRFAR-bound binary and ternary complexes.** The hydrophobic contacts defining the measured distances (with Roman numerals) are defined in Figure S1.

|                        | apo   | PRFAR | 1     | 2     | 3     |
|------------------------|-------|-------|-------|-------|-------|
| (I) <i>fV48-fL50</i>   | 5.02  | 6.58  | 4.84  | 5.24  | 5.86  |
| (II) <i>fL50-fI52</i>  | 6.97  | 5.02  | 7.40  | 6.47  | 5.45  |
| (III) <i>fI52-fF23</i> | 7.23  | 6.98  | 8.54  | 13.85 | 10.57 |
| (IV) <i>fL50-fF23</i>  | 11.77 | 8.91  | 14.99 | 19.97 | 15.86 |
| (II)+(III)+(IV)        | 25.79 | 20.91 | 30.93 | 40.29 | 31.88 |

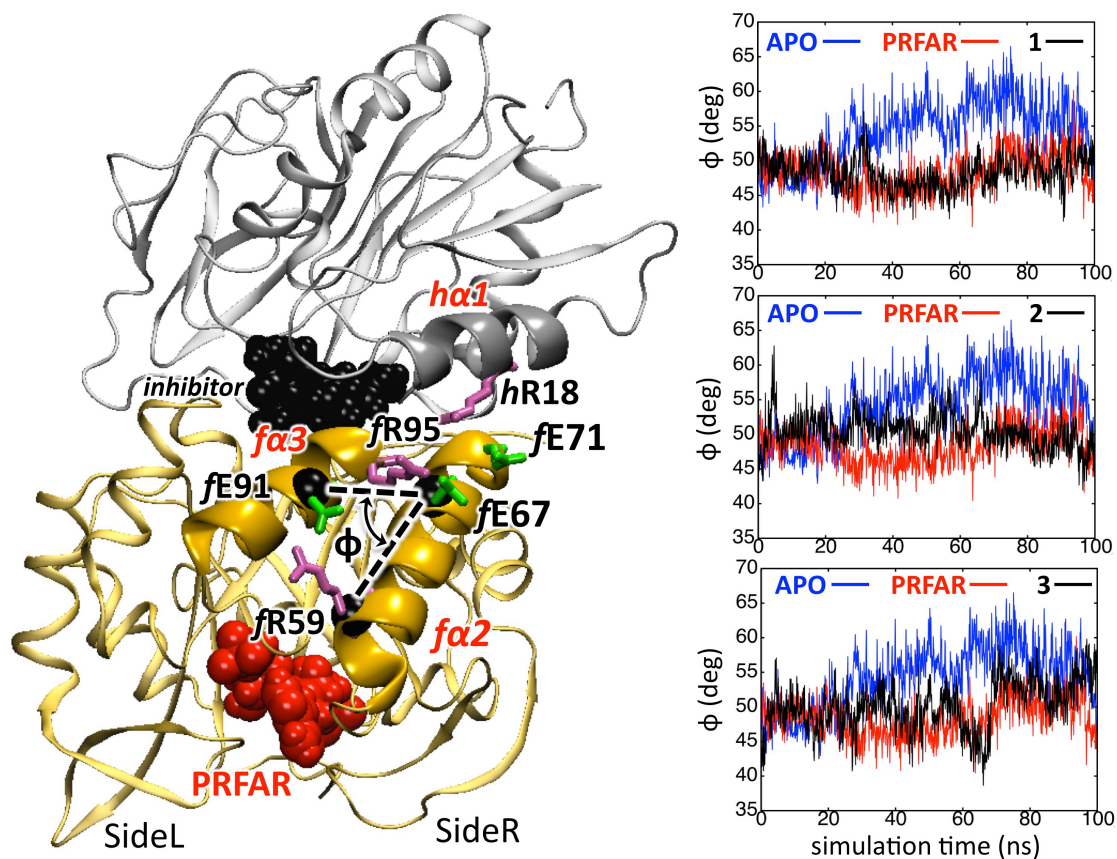

**Figure S2. Relative positions of the *fa2* and *fa3* helices in the apo, PRFAR-bound binary and ternary complexes.** The charged amino acid residues in the *fa2* and *fa3* helices are involved in specific contacts (left panel) that induce different relative positions of the two helices in the apo and PRFAR-bound complexes, taking an active part in the IGPS allosteric mechanism. The relative positions of the two helices are monitored (right panels) in along the 0.1  $\mu$ s MD simulations of the apo (blue), binary PRFAR-bound (red) and the ternary complexes (in black) with potential inhibitors **1-3**.

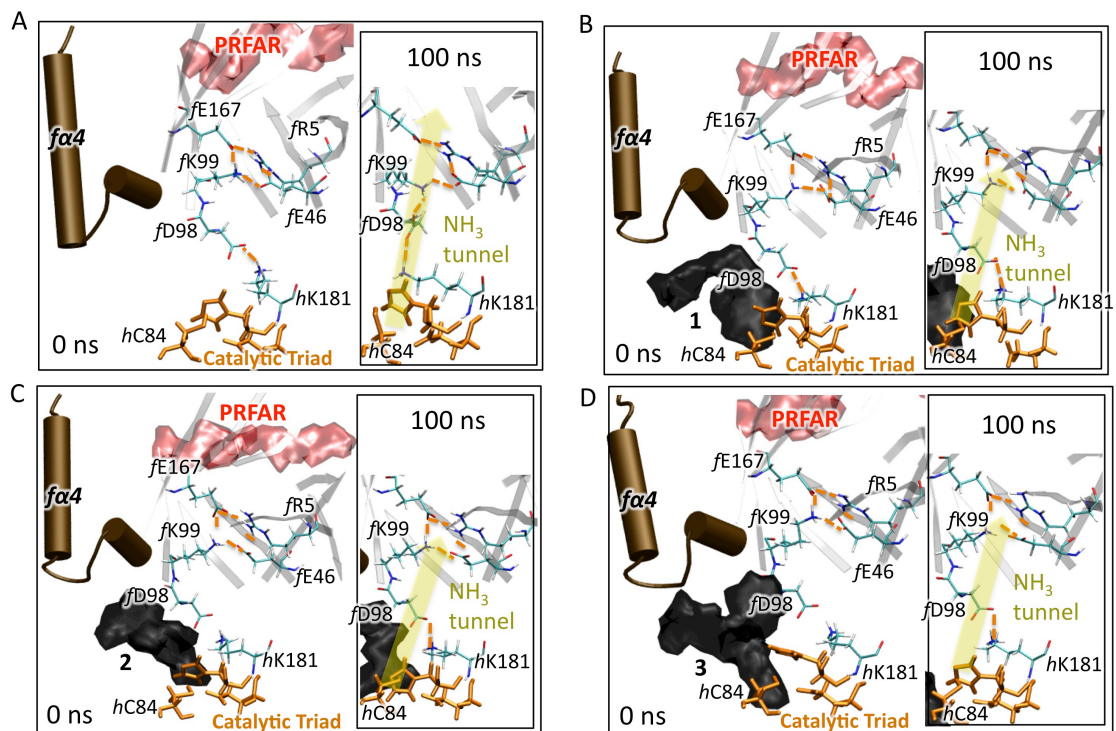

**Figure S3. The influence of the inhibitor binding on the ammonia gate.** Residues  $fR5$ ,  $fE46$ ,  $fK99$ , and  $fE167$  create salt bridges that serve as ammonia gate for the HisF ( $\beta/\alpha$ )<sub>8</sub> barrel that opens within 100 ns in the MD trajectory of the PRFAR-bound binary complex (A), as expected for an active IGPS conformation, due to interactions between  $fK99$  and  $fD98$  side chains. When the inhibitors 1-3 bind (B-D) the gate remain closed due to the altered dynamics of  $fD98$  induced by the interfacial ligands.

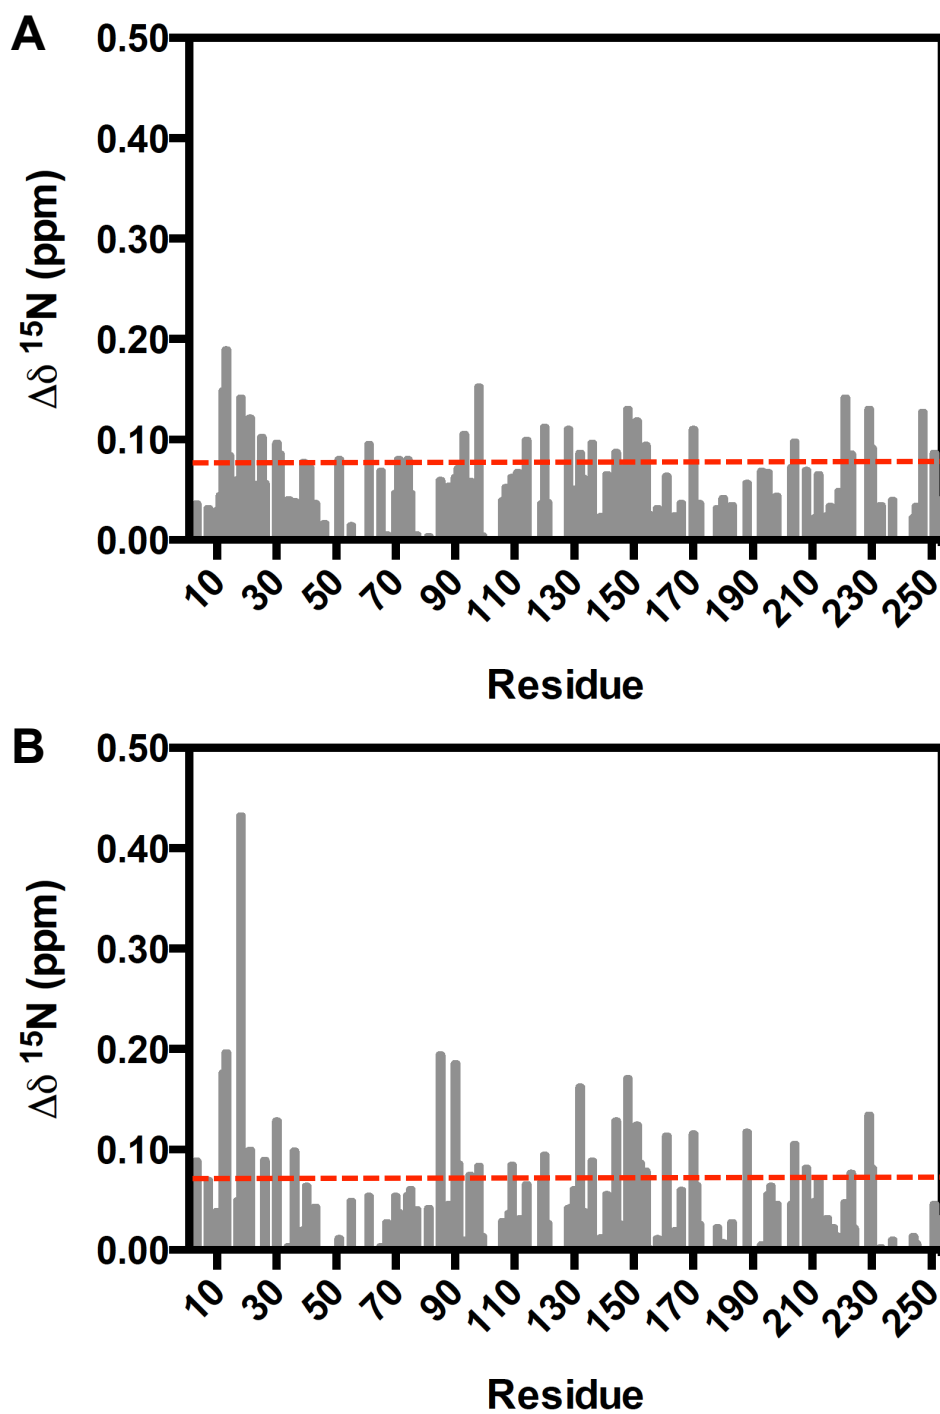

**Figure S4. Chemical shift perturbations in the HisF domain of (A) apo IGPS and (B) PRFAR-bound IGPS upon titration with 3. The red line represents the 10% trimmed mean of all shifts, and perturbations greater than this cutoff are deemed significant.**

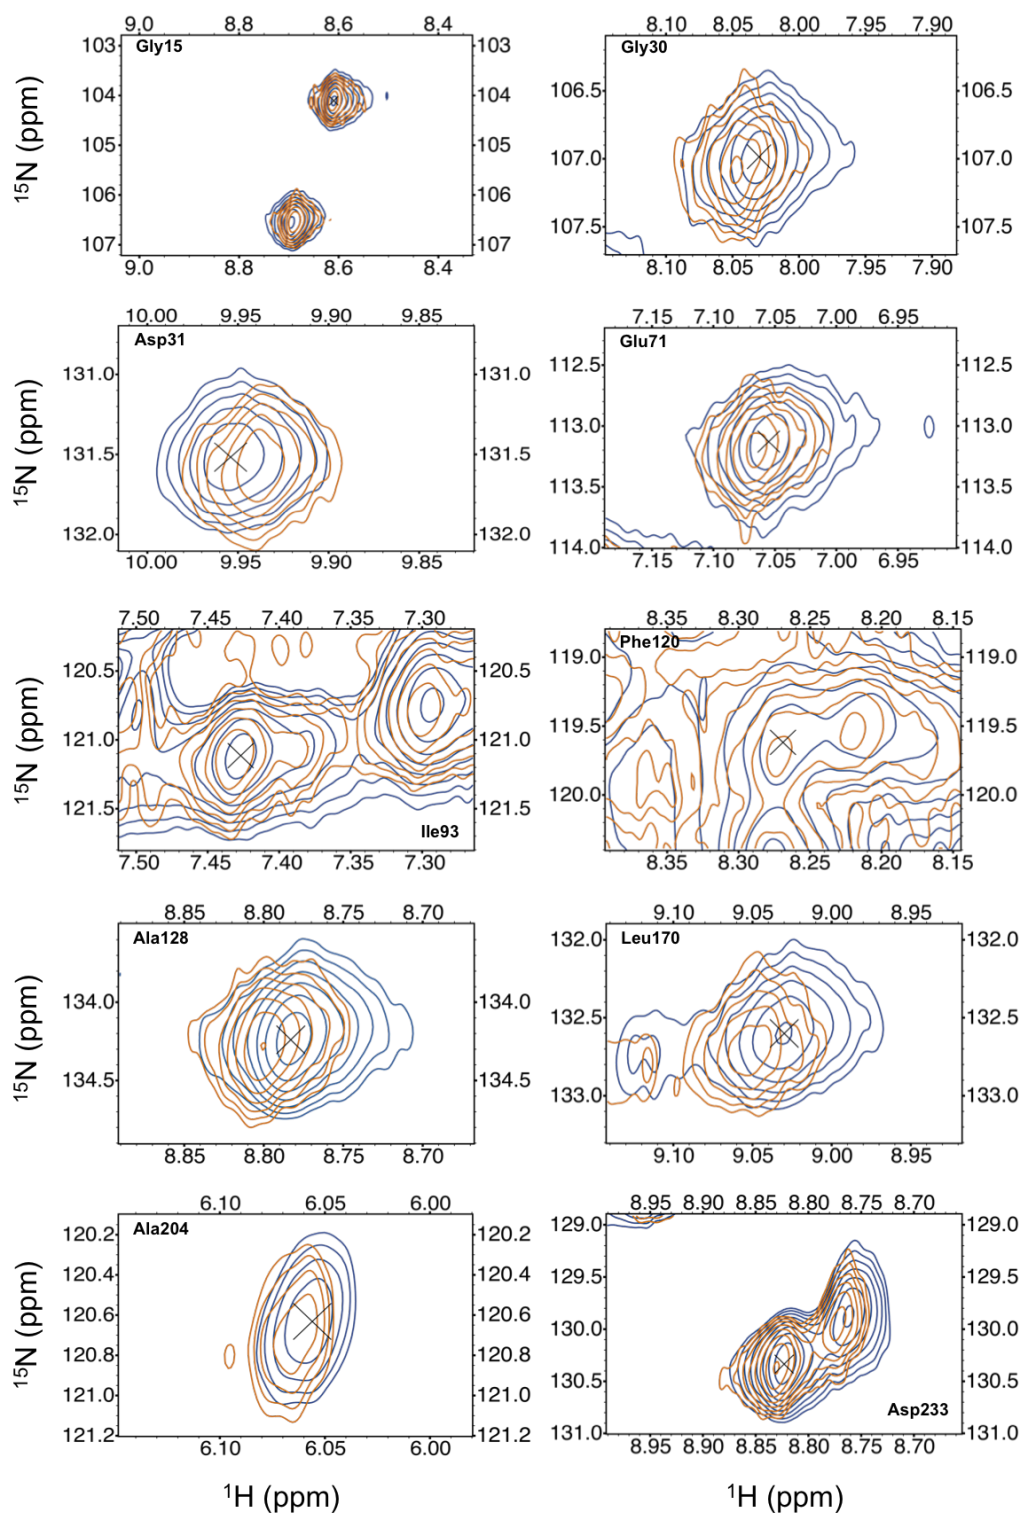

**Figure S5. Representative correlation peaks from  $^1\text{H}$ - $^{15}\text{N}$  HSQC NMR experiments of  $^{15}\text{N}$ -labeled HisF-IGPS.** Titration of **3** into apo IGPS (blue) to a concentration of 3.17 mM (orange) causes distinct shifts in several resonances (Gly30, Asp31, Glu71, etc), while others remain unchanged (Gly15, Ile93). Significant chemical shift differences ( $\Delta\delta$ ) are summarized in Figure S6.

|                 |       |
|-----------------|-------|
| <i>f</i> Lys13  | 0.189 |
| <i>f</i> Asp98  | 0.152 |
| <i>f</i> Val12  | 0.145 |
| <i>f</i> Val18  | 0.141 |
| <i>f</i> Ala221 | 0.140 |
| <i>f</i> Asn148 | 0.130 |
| <i>f</i> Phe229 | 0.130 |
| <i>f</i> Asn247 | 0.127 |
| <i>f</i> Thr21  | 0.121 |
| <i>f</i> Ile151 | 0.118 |
| <i>f</i> Phe120 | 0.112 |
| <i>f</i> Ala128 | 0.110 |
| <i>f</i> Leu170 | 0.110 |
| <i>f</i> Ile93  | 0.105 |
| <i>f</i> Asn25  | 0.102 |
| <i>f</i> Thr114 | 0.099 |
| <i>f</i> Ala204 | 0.097 |
| <i>f</i> Gly30  | 0.096 |
| <i>f</i> Gly136 | 0.096 |
| <i>f</i> Thr61  | 0.095 |
| <i>f</i> Arg154 | 0.094 |
| <i>f</i> Arg230 | 0.091 |
| <i>f</i> Ser144 | 0.087 |
| <i>f</i> Gly20  | 0.086 |
| <i>f</i> Lys132 | 0.086 |
| <i>f</i> Glu251 | 0.086 |
| <i>f</i> Asp31  | 0.085 |
| <i>f</i> Ala223 | 0.085 |
| <i>f</i> Asp51  | 0.080 |
| <i>f</i> Glu71  | 0.080 |
| <i>f</i> Asp74  | 0.080 |

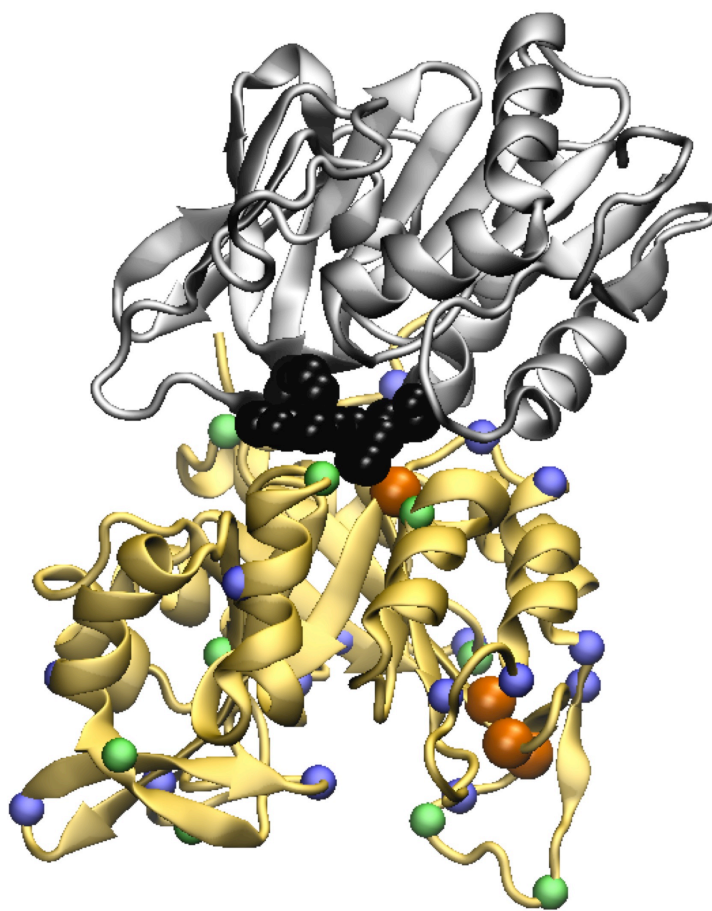

**Figure S6. Chemical shifts changes in apo IGPS induced by binding of 3.** Titration of **3** into apo IGPS (blue) to a concentration of 3.17 mM (orange) causes distinct shifts in several resonances (listed in the left panel). Residues with  $\Delta\delta > 0.14$  (orange balls at C $\alpha$ ),  $\Delta\delta > 0.10$  (light green) and  $\Delta\delta > 0.08$  (blue balls) are mapped onto the **3**-IGPS structure. Chemical shifts are determined by  $^1\text{H}$ - $^{15}\text{N}$  HSQC NMR experiments of  $^{15}\text{N}$ -labeled HisF-IGPS.

**Table S2.  $^{15}\text{N}$  Chemical shift perturbations of HisH residues upon titration of apo IGPS with 3 (3.2 mM). Residues with  $\Delta\delta > 0.06$  ppm were determined to be statistically significant from the 10% trimmed mean.**

| <i>Residue</i> | $\Delta\delta$ (ppm) |
|----------------|----------------------|
| <i>Arg18</i>   | 0.092                |
| <i>Ser24</i>   | 0.077                |
| <i>Ile32</i>   | 0.200                |
| <i>Phe54</i>   | 0.051                |
| <i>Gly55</i>   | 0.076                |
| <i>Leu66</i>   | 0.061                |
| <i>Phe69</i>   | 0.071                |
| <i>Glu92</i>   | 0.140                |
| <i>Glu95</i>   | 0.061                |
| <i>Thr155</i>  | 0.065                |
| <i>Arg200</i>  | 0.076                |



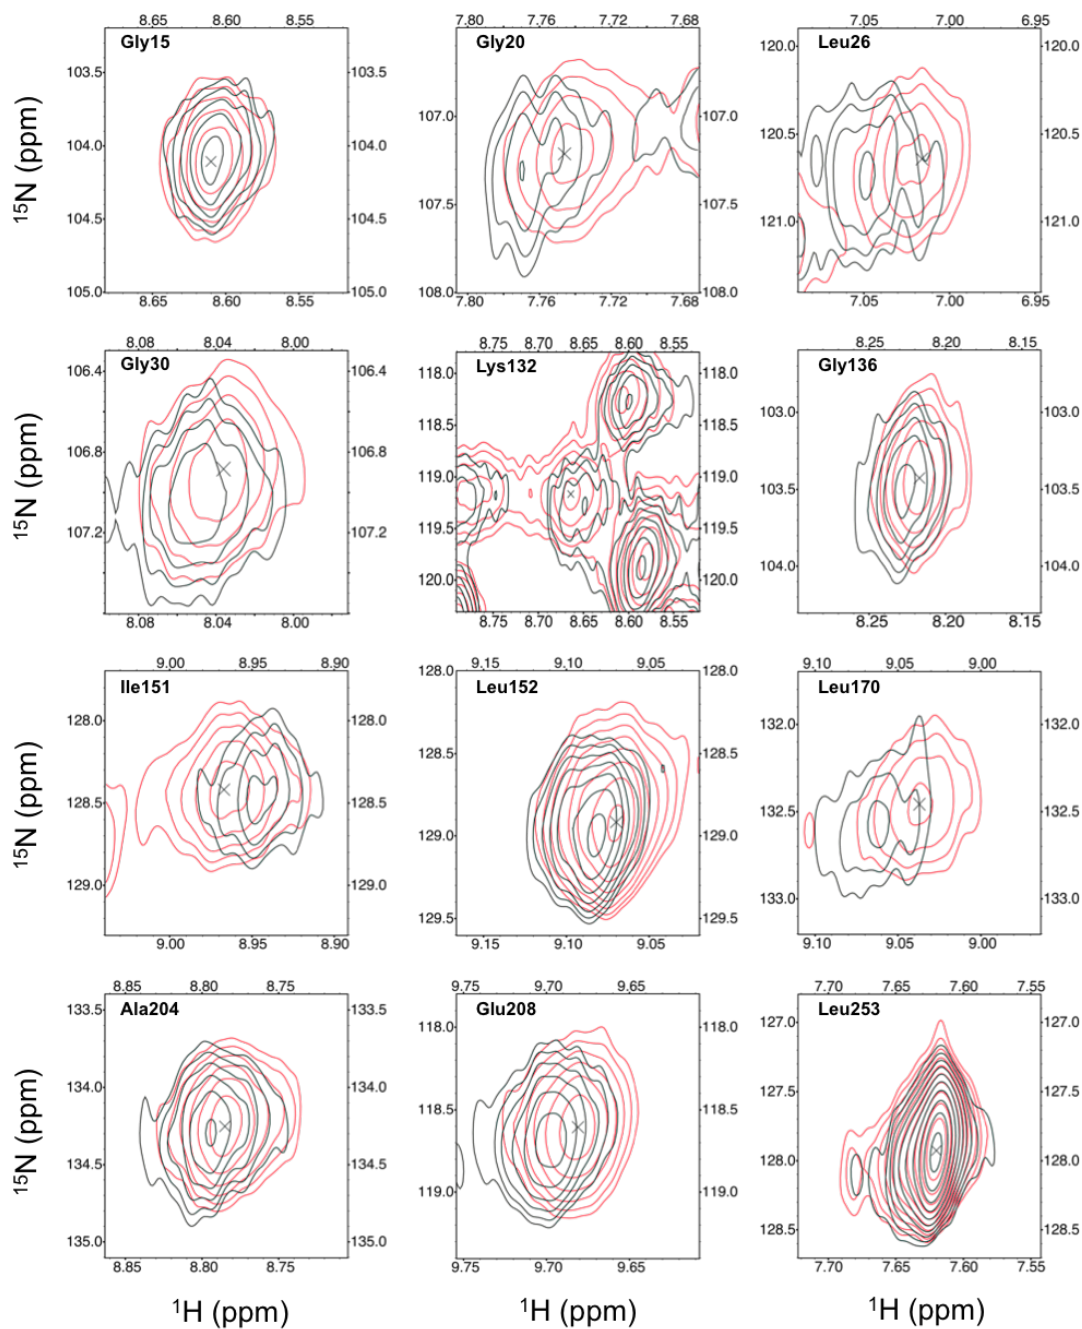

**Figure S7. Representative correlation peaks from  $^1\text{H}$ - $^{15}\text{N}$  HSQC NMR experiments of  $^{15}\text{N}$ -labeled HisF-IGPS.** Titration of PRFAR into apo IGPS to a concentration of 0.96 mM (red) causes distinct shifts in several resonances, and titration of **3** into the binary complex to a concentration of 9.2 mM (black) causes further perturbation. Significant chemical shift differences ( $\Delta\delta$ ) are summarized in Figure S8.

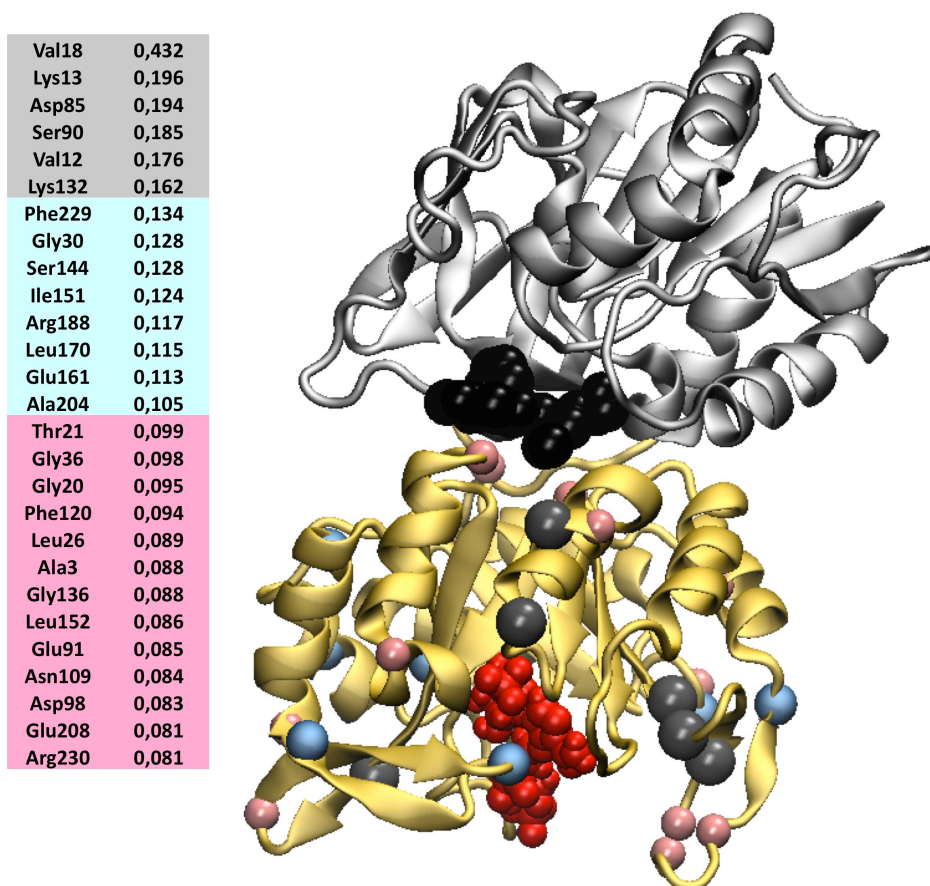

**Figure S8. Chemical shifts changes in PRFAR-bound IGPS induced by binding of 3.**

Titration of **3** into binary IGPS (red) to a concentration of 9.2 mM (grey) causes distinct shifts in several resonances (listed in the left panel). Residues with  $\Delta\delta > 0.14$  (grey balls),  $\Delta\delta > 0.10$  (light blue) and  $\Delta\delta > 0.08$  (pink balls) are mapped onto the 3-IGPS structure. Chemical shifts are determined by  $^1\text{H}$ - $^{15}\text{N}$  HSQC NMR experiments of  $^{15}\text{N}$ -labeled HisF of the binary IGPS complex, with PRFAR concentration of 0.96 mM.

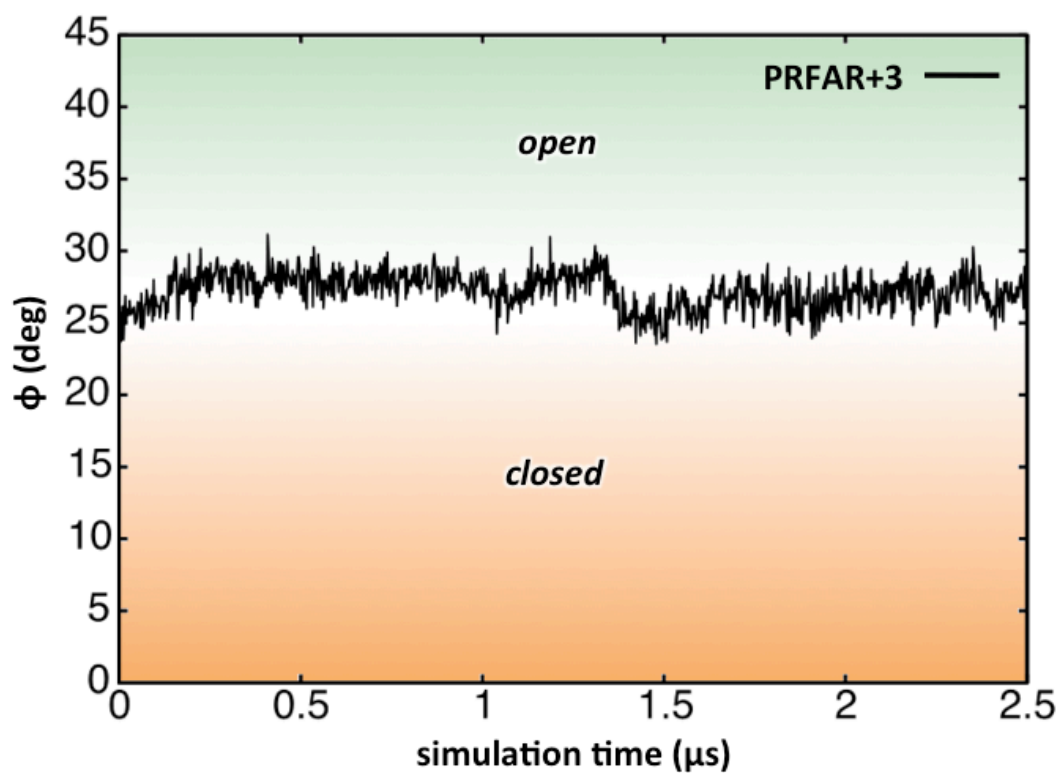

**Figure S9. Breathing motion of the PRFAR-bound 3-IGPS ternary complexes.** The breathing motion is measured by the angle ( $\phi$ ) defined by the  $C\alpha$  of the  $fF120$ ,  $hW123$  and  $hG52$  (see main text). The evolution of  $\phi$  during the MD simulation time (0-2.5  $\mu$ s) is reported.
